# Supplementary material
Source: PubMed Central journal article supplement (PMC9737514)
Supplement: mmc4.pdf [file mmc4.pdf]

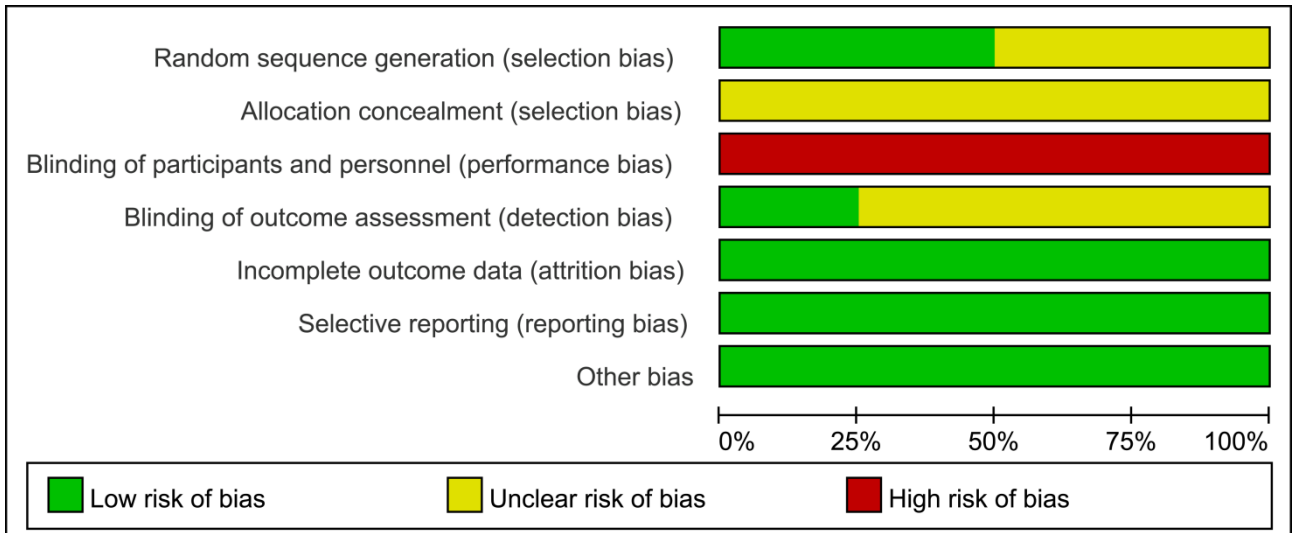

|  | Sozio 2021 | Shah 2021 | Dengiz 2022 | Araimo 2021 |                                                           |
|--|------------|-----------|-------------|-------------|-----------------------------------------------------------|
|  | +          | ?         | ?           | +           | Random sequence generation (selection bias)               |
|  | ?          | ?         | ?           | ?           | Allocation concealment (selection bias)                   |
|  | -          | -         | -           | -           | Blinding of participants and personnel (performance bias) |
|  | ?          | ?         | +           | ?           | Blinding of outcome assessment (detection bias)           |
|  | +          | +         | +           | +           | Incomplete outcome data (attrition bias)                  |
|  | +          | +         | +           | +           | Selective reporting (reporting bias)                      |
|  | +          | +         | +           | +           | Other bias                                                |
